# Supplementary material for: Sensitive and fast fluorescence-based indirect sensing of TATP
Source: Royal Society of Chemistry journal article supplement (doi:10.1039/c9ra00693a), 2019-01-01
Supplement: c9ra00693a1.pdf [file c9ra00693a1.pdf]

Supporting Information

### Sensitive and fast fluorescence-based indirect sensing of TATP

Shengqiang Fan, Paul L. Burn,\* Paul E. Shaw\*

Centre for Organic Photonics & Electronics, School of Chemistry and Molecular Biosciences, The University of Queensland, Brisbane, QLD 4072, Australia

E-mail: p.burn2@uq.edu.au, p.shaw3@uq.edu.au

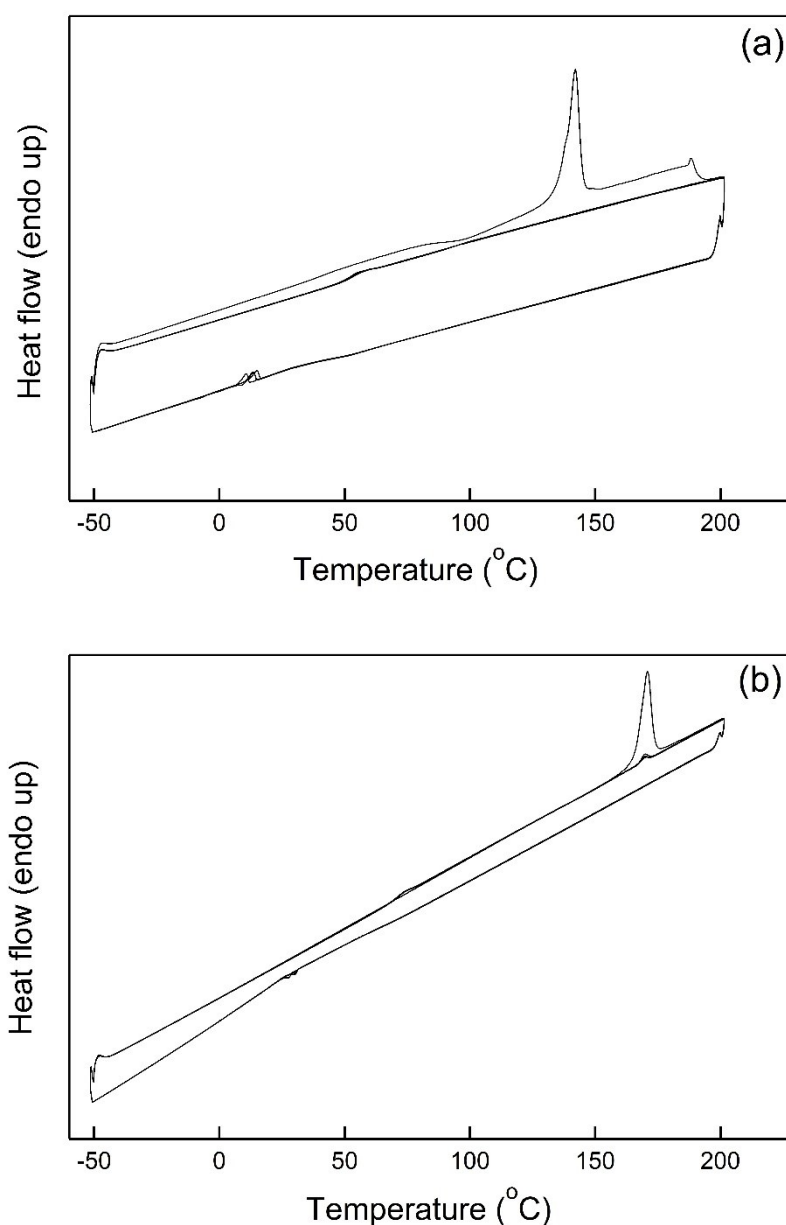

**Figure S1** Differential scanning calorimetry (DSC) analysis of (a) **1** and (b) **2**. (4 scans; scan rate 50 °C/min).

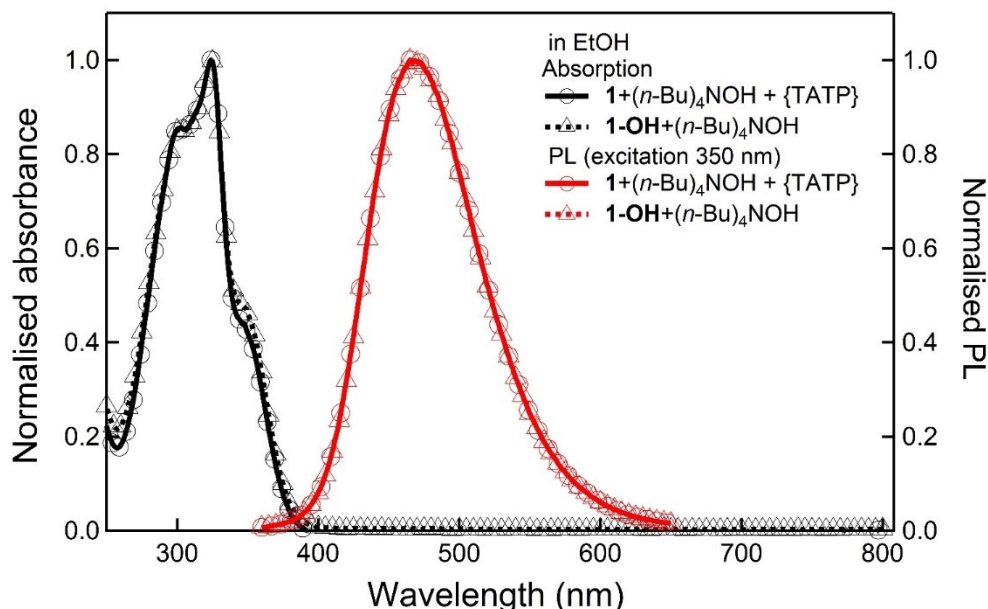

**Figure S2** UV-vis absorption and photoluminescence spectra of boronate ester **1** in ethanol after exposure to {TATP} in comparison with the corresponding phenoxide. **1**+(*n*-Bu)<sub>4</sub>NOH+{TATP}: **1** ( $1.4 \times 10^{-5}$  M) and (*n*-Bu)<sub>4</sub>NOH ( $9.4 \times 10^{-5}$ ) in ethanol was exposed to {TATP} (derived from 16 ppm TATP) for 5 min; **1-OH**+(*n*-Bu)<sub>4</sub>NOH: **1-OH** ( $2.0 \times 10^{-5}$  M) and (*n*-Bu)<sub>4</sub>NOH ( $9.4 \times 10^{-5}$ ) in ethanol.

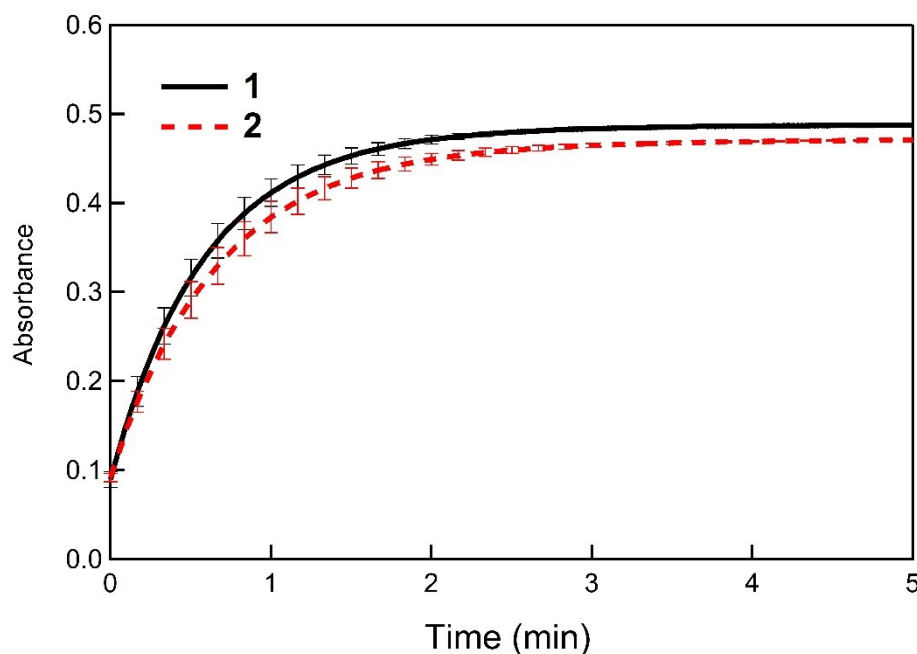

**Figure S3** UV-visible absorption kinetics for the conversion of boronate esters (**1** or **2**) to phenoxides (**1-O•** at 349 nm or **2-O•** at 362 nm) by reaction with H<sub>2</sub>O<sub>2</sub>. The measurements were undertaken by adding aqueous H<sub>2</sub>O<sub>2</sub> ( $2.5 \times 10^{-4}$  M) to a solution of **1** ( $2.0 \times 10^{-5}$  M) or **2** ( $1.6 \times 10^{-5}$  M) and (*n*-Bu)<sub>4</sub>NOH ( $1.3 \times 10^{-3}$  M) in ethanol. The half-life ( $t_{1/2}$ ) was estimated from fitting an exponential function to be 15 and 18 s for **1** and **2**, respectively. The errors represent the deviation of the average of three measurements.

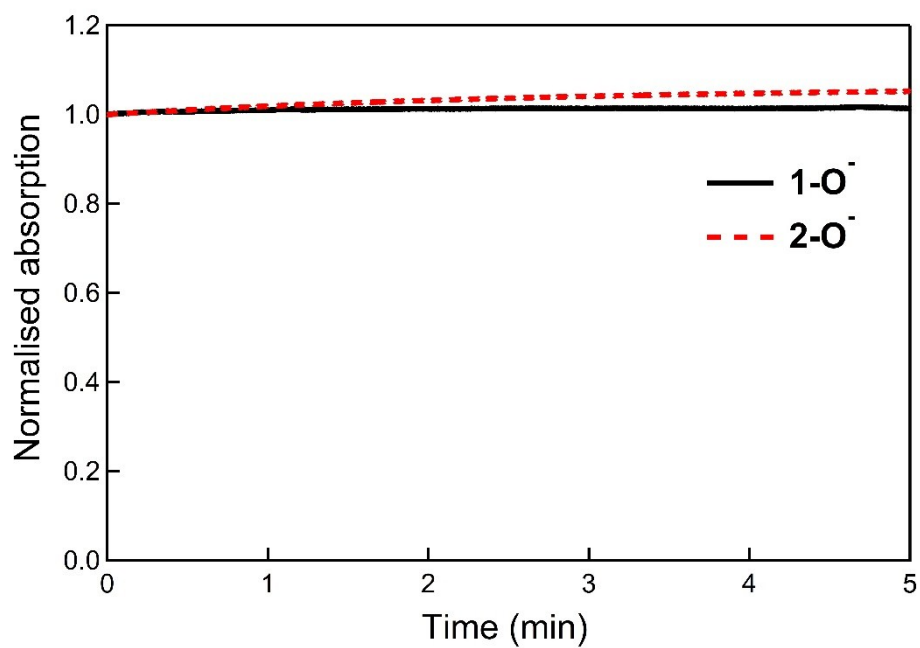

**Figure S4** Normalised absorption of **1-O<sup>-</sup>** and **2-O<sup>-</sup>** solutions under illumination at 349 nm and 362 nm in the spectrometer, respectively for 5 min after generation with H<sub>2</sub>O<sub>2</sub> as per Figure S3.

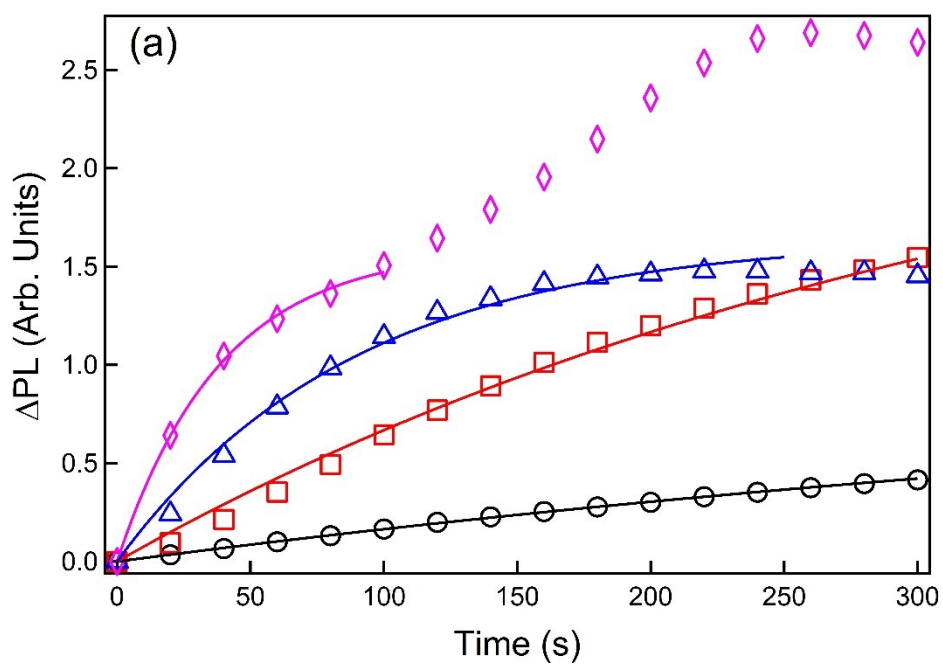

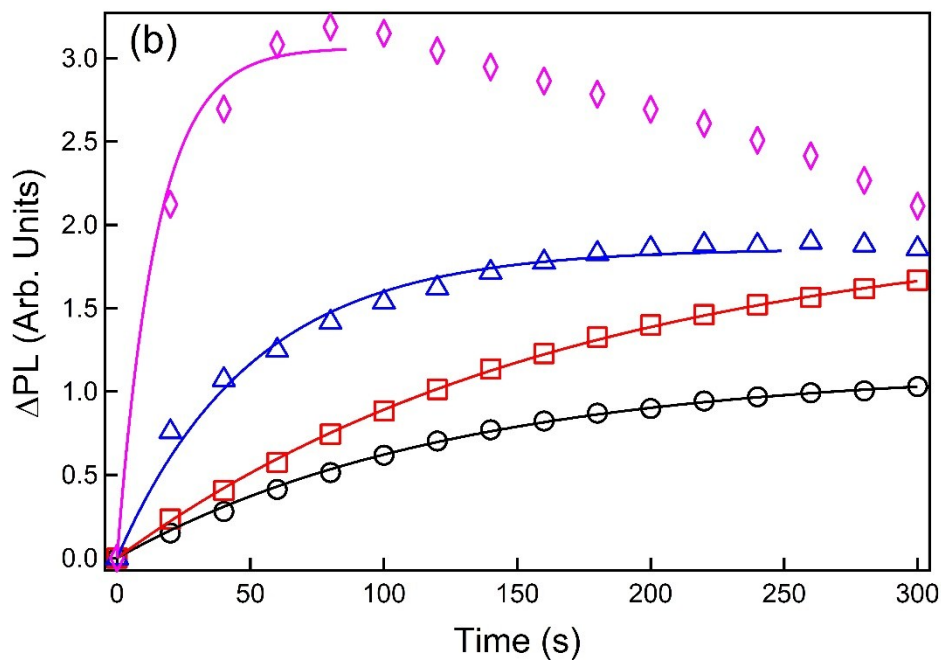

**Figure S5** Representative PL kinetics at various TATP vapour concentrations (O: 0.3 ppm; □: 0.9 ppm; △: 1.7 ppm; ◇: 5.3 ppm) and fitted curves (solid lines) using the first-order reaction equation,  $\Delta PL = K(1 - e^{-kt})$  ( $\Delta PL$  = the increase of fluorescence intensity,  $K$  = constant, and  $k$  is a constant related to the overall reaction rate).<sup>1</sup> The films were fabricated by drop-casting a solution of the boronate ester sensing material (a) **1**, or (b) **2** containing (*n*-Bu)<sub>4</sub>NOH (6 equiv). The data used for the fits was chosen to minimize the effect of photodegradation on the determination of the rate constants. Despite the competing reactions of phenoxide generation and subsequent photodegradation we find that the PL kinetics curves can be fitted with a first-order reaction equation,  $\Delta PL = K(1 - e^{-kt})$ .<sup>1</sup>

## References

1 M. Xu, J.-M. Han, Y. Zhang, X. Yang and L. Zang, *Chem. Commun.*, 2013, **49**, 11779-11781.
